# Supplementary material for: A mRNA-Responsive G-Quadruplex-Based Drug Release System
Source: PubMed Central journal article supplement (PMC4431183; doi:10.3390/s150409388), 2015-04-21
Supplement: sensors-15-09388-s001.pdf [file sensors-15-09388-s001.pdf]

*Supplementary Information*

## **A mRNA-Responsive G-Quadruplex-Based Drug Release System. *Sensors* 2015, 15, 9388-9403**

**Hidenobu Yaku<sup>1</sup>, Takashi Murashima<sup>2</sup>, Daisuke Miyoshi<sup>2,\*</sup> and Naoki Sugimoto<sup>2,3</sup>**

<sup>1</sup> Advanced Research Division, Panasonic Corporation, 3-4 Hikaridai, Seika-cho, Soraku-gun, Kyoto 619-0237, Japan; E-Mail: [yaku.hidenobu@jp.panasonic.com](mailto:yaku.hidenobu@jp.panasonic.com)

<sup>2</sup> Faculty of Frontiers of Innovative Research in Science and Technology (FIRST), Konan University, 7-1-20 Minatojima-Minamimachi, Chuo-ku, Kobe 650-0047, Japan; E-Mails: [murasima@konan-u.ac.jp](mailto:murasima@konan-u.ac.jp) (T.M.); [sugimoto@konan-u.ac.jp](mailto:sugimoto@konan-u.ac.jp) (N.S.)

<sup>3</sup> Frontier Institute for Biomolecular Engineering Research (FIBER), Konan University, 7-1-20 Minatojima-Minamimachi, Chuo-ku, Kobe 650-0047, Japan

\* Author to whom correspondence should be addressed; E-Mail: [miyoshi@center.konan-u.ac.jp](mailto:miyoshi@center.konan-u.ac.jp); Tel: +81-78-303-1426; Fax: +81-78-303-1495.

---

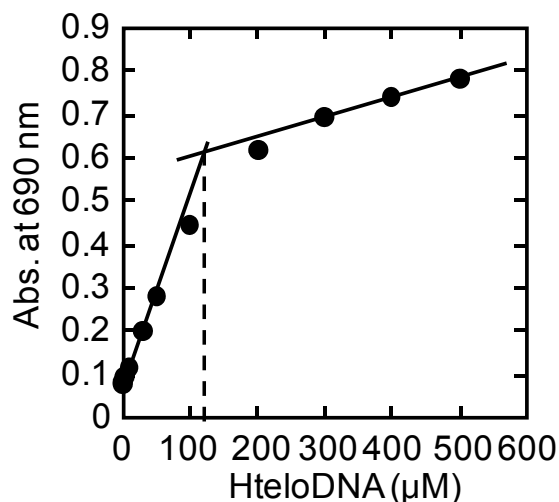

**Figure S1.** Change in absorbance at 690 nm of 100  $\mu\text{M}$  Cu-APC with 0–500  $\mu\text{M}$  Htelo-DNA in a buffer containing 50 mM MES-LiOH (pH 7.0), 100 mM KCl, and 10 mM  $\text{MgCl}_2$  at 25  $^\circ\text{C}$ .

A

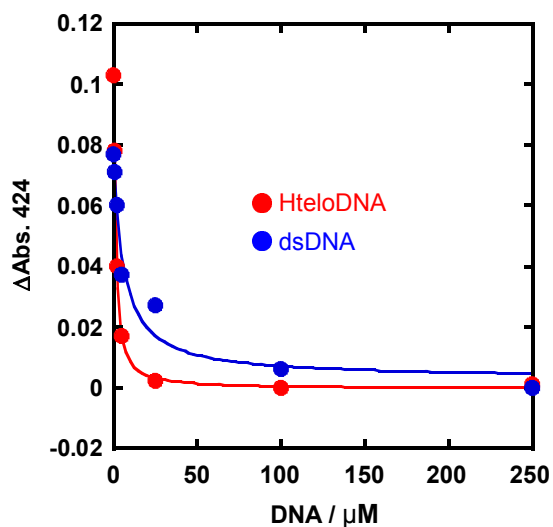

B

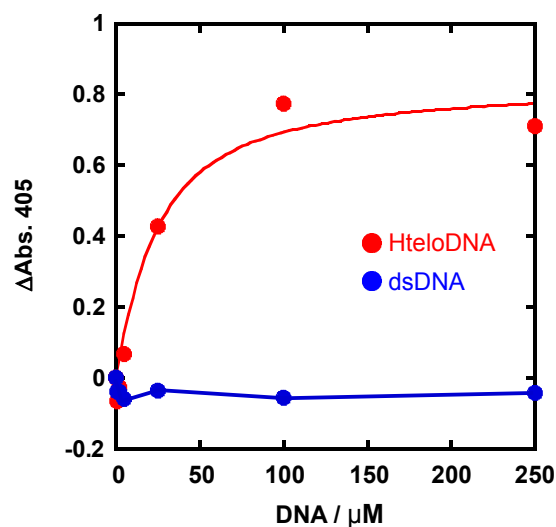

**Figure S2.** (A) Absorbance of 1.0  $\mu\text{M}$  TMPyP4 at 424 nm (A) and 12.5  $\mu\text{M}$  Hemin at 405 nm (B) with 0–250  $\mu\text{M}$  of HteloDNA and 0–250  $\mu\text{M}$  of dsDNA (5'-AGAAGAGAAAGA-3'/5'-TCTTTCTCTTCT-3'). Before measurement, the sample was heated at 80  $^\circ\text{C}$  for 2 min, gently cooled at 2  $^\circ\text{C}\cdot\text{min}^{-1}$ . All measurements were carried out in a buffer containing 50 mM MES-LiOH (pH 7.0), 100 mM KCl, and 10 mM  $\text{MgCl}_2$  at 25  $^\circ\text{C}$ .

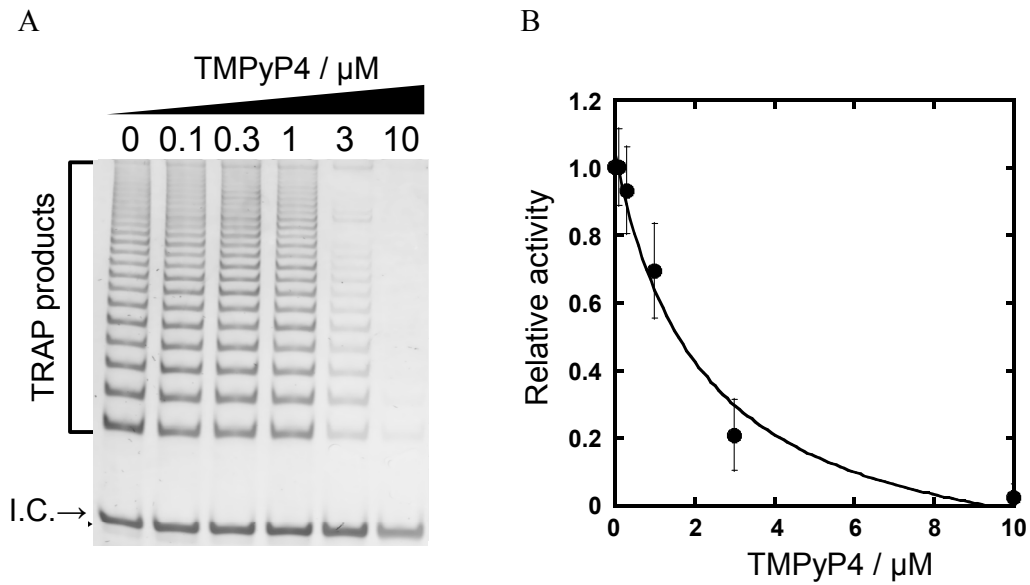

**Figure S3.** (A) Electrophoresis result of the two-step TRAP assay with 0–10  $\mu\text{M}$  of TMPyP4. I.C. indicates the internal control for PCR amplification; (B) Relative activity of telomerase with 0–10  $\mu\text{M}$  of TMPyP4. The relative activity value of 1 corresponds to the positive control, namely without TMPyP4.

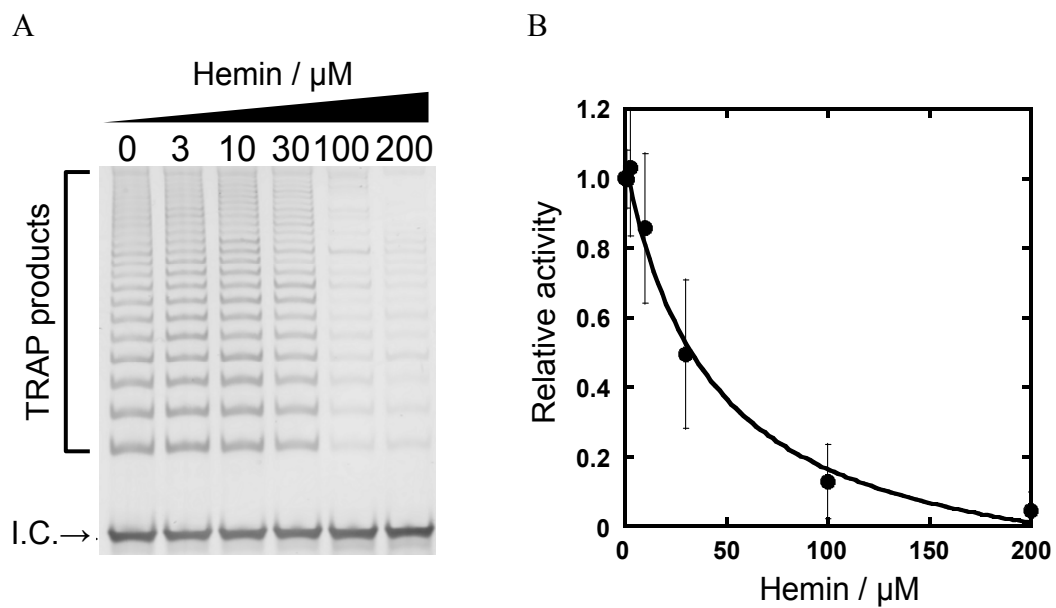

**Figure S4.** (A) Electrophoresis result of the two-step TRAP assay with 0–200  $\mu\text{M}$  of Hemin. I.C. indicates the internal control for PCR amplification; (B) Relative activity of telomerase with 0–200  $\mu\text{M}$  of Hemin. The relative activity value of 1 corresponds to the positive control, namely without Hemin.

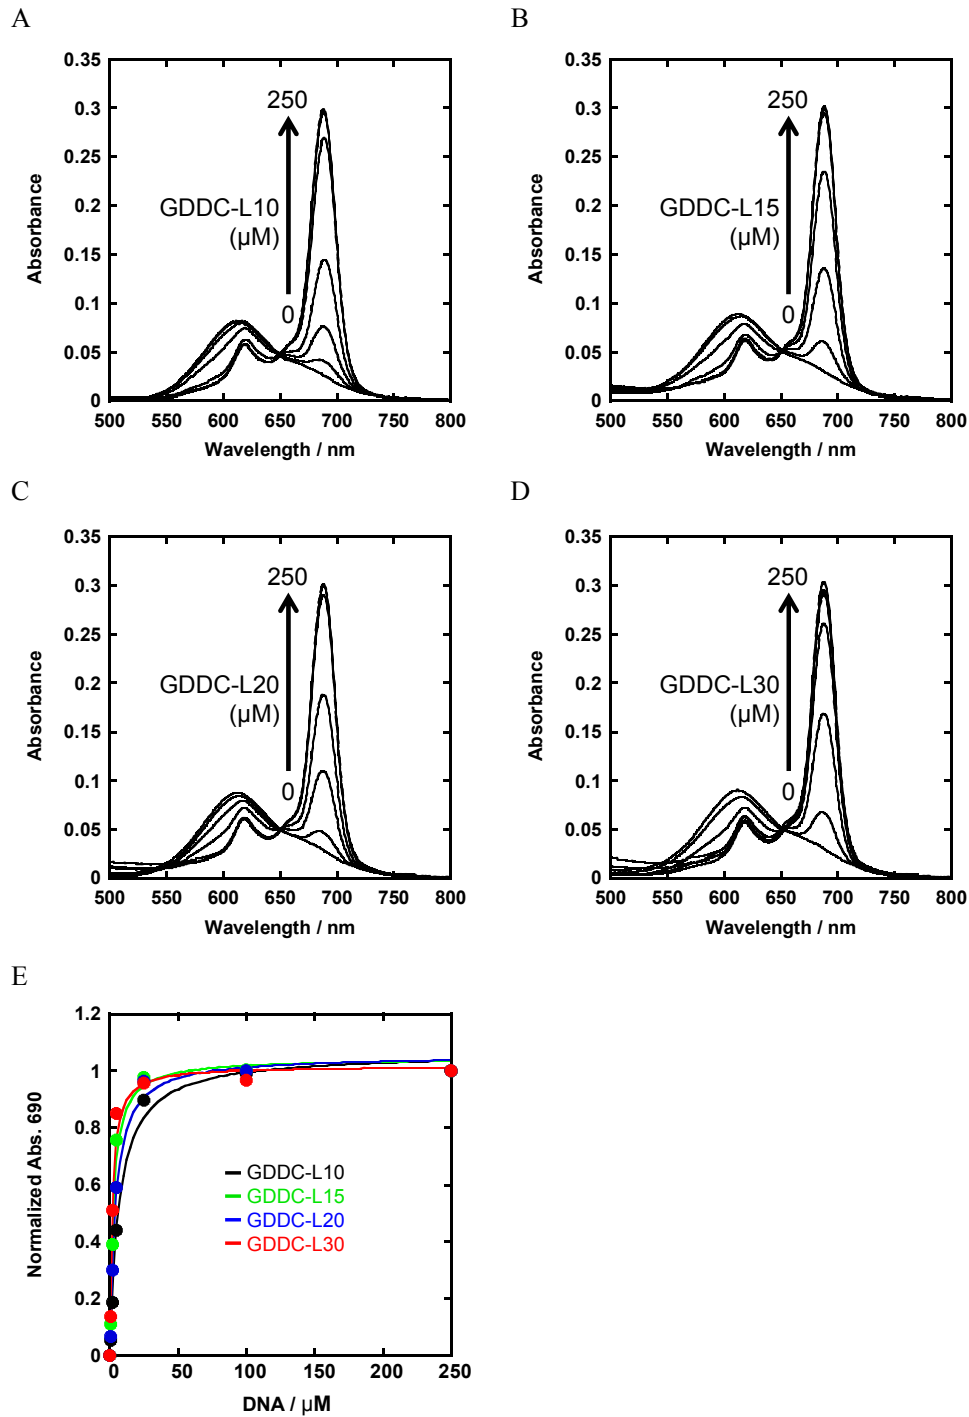

**Figure S5.** Visible absorbance spectra of 2.5  $\mu\text{M}$  CuAPC with 0–250  $\mu\text{M}$  of GDDC-L10 (A); GDDC-L15 (B); GDDC-L20 (C); and GDDC-L30 (D). Before measurement, the samples were heated at 80  $^{\circ}\text{C}$  for 2 min, gently cooled at 2  $^{\circ}\text{C}\cdot\text{min}^{-1}$ ; (E) Normalized absorbance of 2.5  $\mu\text{M}$  CuAPC at 690 nm with 0–250  $\mu\text{M}$  of each GDDC candidate. All measurements were carried out in a buffer containing 50 mM MES-LiOH (pH 7.0), 100 mM KCl, and 10 mM  $\text{MgCl}_2$  at 25  $^{\circ}\text{C}$ .
